# Supplementary material
Source: PubMed Central journal article supplement (PMC2859553)

## Supplementary Data

### Supplemental Materials and Methods

#### Cloning, expression and purification of ZO-1 fragments

*Constructs for structure determination.* A fragment of ZO-1 (see Fig. 1A) encoding residues 516 to 806 was amplified from the human ZO-1 cDNA (Genbank # NM\_175610) by amplification with Taq polymerase using sense primer GCCATATGGGAGATTCTTTCTATATTAGAAC and antisense primer GCGGATCCTCAATCCGCCTTTCCTCGGA and subcloned into the Nde I/Bam HI sites of pET14b. This SG construct diffracted up to  $\sim 3.7$  Å and thus a truncation mutation of the U5 region, believed to be a flexible linker based on the previous structure of the homologous PSD-95 MAGUK family member, was made on this construct using the following primers (5'-3'):

GCCAGTGACAGTATGTTCAAACAAAGTTC and

GAACCTTGTGTTGAACATACTGTACTGGC. The boundaries of the truncation (SGΔU5; deletion of residues 589-625) were chosen according to the structure-based sequence alignment of rat PSD-95 with the SG sequences of the ZO family across multiple species. The homologous sequences encoding the helix observed in PSD-95 prior to the flexible U5 region (called the HOOK domain in PSD-95 and DLG) was retained and several residues N-terminal to the highly conserved beta-strand that maintains the inter-domain organization were included to ensure an unrestrained linker connection. Additionally, to facilitate heavy atom derivatization for phasing purposes, a cysteine residue (T709C) was introduced into the SGΔU5 construct using the following primers (5'-3'): GCTTTATTAGATGTATGCCCAAATGCAG and CTGCATTTGGGCATACATCTAATAAAGC.

*Mutagenesis of the GUK domain.* SG constructs with point mutations were generated using the QuikChange Site-Directed Mutagenesis Kit (Stratagene) using the following primers (5'-3'): **TM(A) (K749A/R752A/K753A)** - GAATCTCGGGCTAGTGCCG and CGGCACTAGCCCGAGATTC; **TM(D/E) (K749D/R752D/K753E)** - GAATCTCGGGATAGTGCCG and CGGCACTATCCCGAGATTC; **PM(D/E) (K749D/R752D/K753E/K760E/K763E)** -

CGAGCGATCTCATGAGCTTCGTGAGAATAATCACC and

GGTGATTATTCTCACGAAGCTCATGAGATCGCTCG. Following PCR and confirmation of the sequences, the plasmids were transformed into *E. coli* BL21 (DE3).

*Expression and Purification.* Cells in 2YT media were grown to an optical density (O.D.) of 0.6 and then induced with 0.1 mM IPTG, and left to grow overnight at 22 °C. For selenomethionine (SeMet)-containing SGAU5, the cells were grown in M9 minimal media and the protein expressed through methionine biosynthesis inhibition(30) and supplemented with 0.25 g/L MgSO<sub>4</sub>, 5 g/L glucose, 0.015 g/L CaCl<sub>2</sub>, and 0.001 g/L each of riboflavin, niacinamide, thiamine, and pyridoxine monochloride. The incorporation of four SeMet sites was confirmed using mass spectrometry. Lysis was accomplished by sonication in a buffer composed of 50 mM Tris-HCl pH 7.5, 1 M NaCl, 10 % glycerol, 1 % Triton, and 1 mM PMSF. After centrifugation at 30k rpm, the supernatant was loaded onto a nickel-affinity column, and the column washed with 500 ml of a buffer composed of 50 mM Tris-HCl pH 7.5, and 1 M NaCl. The bound protein was eluted with an imidazole gradient. Fractions containing the protein were pooled, concentrated, and injected onto a gel-filtration column equilibrated with 50 mM Tris-HCl pH 7.5, 200 mM NaCitrate pH 7.5, and 3 mM DTT (10 mM for the cysteine mutant and SeMet protein). The purity of the protein preparations was confirmed using SDS-PAGE and detected through Coomassie staining.

## Supplementary Figure Legends

**Fig. S1.** The strand following the GUK domain (b6), in addition to making secondary structure interactions with the terminal strand of the SH3 domain (b5), has a conserved tryptophan residue that intercalates into the SH3 domain. The side-chain of Trp799 penetrates a hydrophobic cavity in the SH3 domain built by Tyr520, Val542 and Leu638, all functionally conserved among MAGUK proteins. The view in the zoom panel is rotated by ~180 degrees relative to the upper panel. The coloring scheme follows that used previously for the ZO-1 SH3-GUK module.

**Table I. Data collection, phasing, and refinement statistics***A. Data sets used in phasing and calculating the experimental electron density map*

| Data Set                      | Native      | p-ClHg       |             | CH <sub>3</sub> HgBr |             | Se-Met      |  |
|-------------------------------|-------------|--------------|-------------|----------------------|-------------|-------------|--|
|                               |             | Benzoic Acid | Crystal 1   | Crystal 2            | Crystal 1   | Crystal 2   |  |
| Wavelength (Å)                | 1.0         | 1.0076       | 1.0088      | 1.0077               | 0.9751      | 0.9756      |  |
| Resolution limit (Å)          | 2.8         | 3.1          | 3.5         | 3.4                  | 2.5         | 3.3         |  |
| Space group                   | P64         | P64          | P64         | P64                  | P64         | P64         |  |
| No. molecules in ASU          | 1           | 1            | 1           | 1                    | 1           | 1           |  |
| Cell dimensions (Å)           |             |              |             |                      |             |             |  |
| a = b                         | 126.5       | 127.6        | 127.7       | 128.9                | 124.7       | 126.1       |  |
| c                             | 35.8        | 36.6         | 36.4        | 36.8                 | 35.3        | 35.76       |  |
| Reflections observed          | 28474       | 40962        | 31732       | 61250                | 81132       | 60331       |  |
| Unique reflections            | 8035        | 10414        | 8262        | 9577                 | 21078       | 9601        |  |
| Multiplicity (last shell)     | 3.5 (3.6)   | 3.9 (3.3)    | 3.8 (3.7)   | 6.4 (6.1)            | 3.8 (3.8)   | 6.3 (5.5)   |  |
| % Completeness (last shell)   | 97.7 (95.1) | 89.4 (76.4)  | 99.4 (97.9) | 98.4 (90.4)          | 99.4 (96.7) | 98.4 (90.3) |  |
| R <sub>sym</sub> (last shell) | 3.7 (19.5)  | 4.6 (49.4)   | 7.8 (59.8)  | 5.2 (37.3)           | 6.4 (59.6)  | 9.6 (35.5)  |  |
| I/s (last shell)              | 20.2 (4.9)  | 18.0 (1.9)   | 16.0 (2.5)  | 22.9 (4.6)           | 14.9 (2.3)  | 18.6 (5.9)  |  |

*B. MIRAS phasing statistics*

|                      |            |   |   |   |   |   |
|----------------------|------------|---|---|---|---|---|
| Resolution range (Å) | 30.0 – 3.0 |   |   |   |   |   |
| No. heavy atom sites |            | 2 | 2 | 2 | 2 | 1 |
| Mean figure of merit | 0.43       |   |   |   |   |   |

*C. Data set used for refinement and refinement statistics*

| Data Set                             | Native       |
|--------------------------------------|--------------|
| Wavelength (Å)                       | 0.9794       |
| Resolution limit (Å)                 | 2.6          |
| Space group                          | P64          |
| No. molecules in ASU                 | 1            |
| Cell dimensions (Å)                  |              |
| a = b                                | 125.8        |
| c                                    | 35.6         |
| Reflections observed                 | 91205        |
| Unique reflections                   | 10199        |
| Multiplicity (last shell)            | 8.9 (9.1)    |
| % Completeness (last shell)          | 99.7 (100.0) |
| R <sub>sym</sub> (last shell)        | 8.5 (58.8)   |
| I/s (last shell)                     | 15.5 (4.4)   |
| Resolution range (Å)                 | 30 - 2.6     |
| R <sub>work</sub> /R <sub>free</sub> | 20.5/28.7    |
| No. reflections for refinement       | 9187         |
| No. reflections in test set (%)      | 1010 (9.9)   |
| No. solvent molecules                | 73           |
| Average B factor (Å <sup>2</sup> )   | 59.6         |
| rms bond length deviation            | 0.011        |
| rms bond angle deviation             | 1.278        |
| Ramachandran plot (residues in):     |              |
| most favored regions (%)             | 90.5         |
| additionally allowed regions (%)     | 9.0          |
| generously allowed regions (%)       | 0.5          |
| disallowed regions (%)               | 0            |
| Residues omitted from final model    | 684-686      |

**Table II. Binding studies of SG/mutants to glutathione-immobilized calmodulin**

| Experiment | SG binding to GST-CaM                                                             |                   | TM(A) binding to GST-CaM                                                          |                   | TM(D/E) binding to GST-CaM                                                         |                   | PM(D/E) binding to GST-CaM                                                          |                   |
|------------|-----------------------------------------------------------------------------------|-------------------|-----------------------------------------------------------------------------------|-------------------|------------------------------------------------------------------------------------|-------------------|-------------------------------------------------------------------------------------|-------------------|
|            | <u>Gel</u>                                                                        | <u>Band ratio</u> | <u>Gel</u>                                                                        | <u>Band ratio</u> | <u>Gel</u>                                                                         | <u>Band ratio</u> | <u>Gel</u>                                                                          | <u>Band ratio</u> |
| 1          |  | 0.94              |  | 0.80              |  | 0.75              |  | 0.63              |
| 2          |  | 1.04              |  | 0.86              |  | 0.67              |  | 0.50              |
| 3          |  | 0.9               |  | 0.78              |  | 0.70              |  | 0.62              |
| Average    |                                                                                   | 0.96              |                                                                                   | 0.81              |                                                                                    | 0.71              |                                                                                     | 0.58              |
| Std. Dev.  |                                                                                   | 0.07              |                                                                                   | 0.04              |                                                                                    | 0.04              |                                                                                     | 0.07              |

SG: The wild-type sequence of the SH3-GUK module of ZO-1

TM(A): Triple mutant in which K749, R752, and K753 were replaced by alanines

TM(D/E): Triple mutant K749D-R752D-K753E

PM(D/E): Penta mutant K749D-R752D-K753E-K760E-K763E

The top band is GST-CaM. The lower band is SG/mutant.

Band ratio is the ratio of integrated band intensity of SG/mutant versus that of GST-CaM.

The average is calculated from three independent experiments, and the standard deviation is shown.

Figure S1

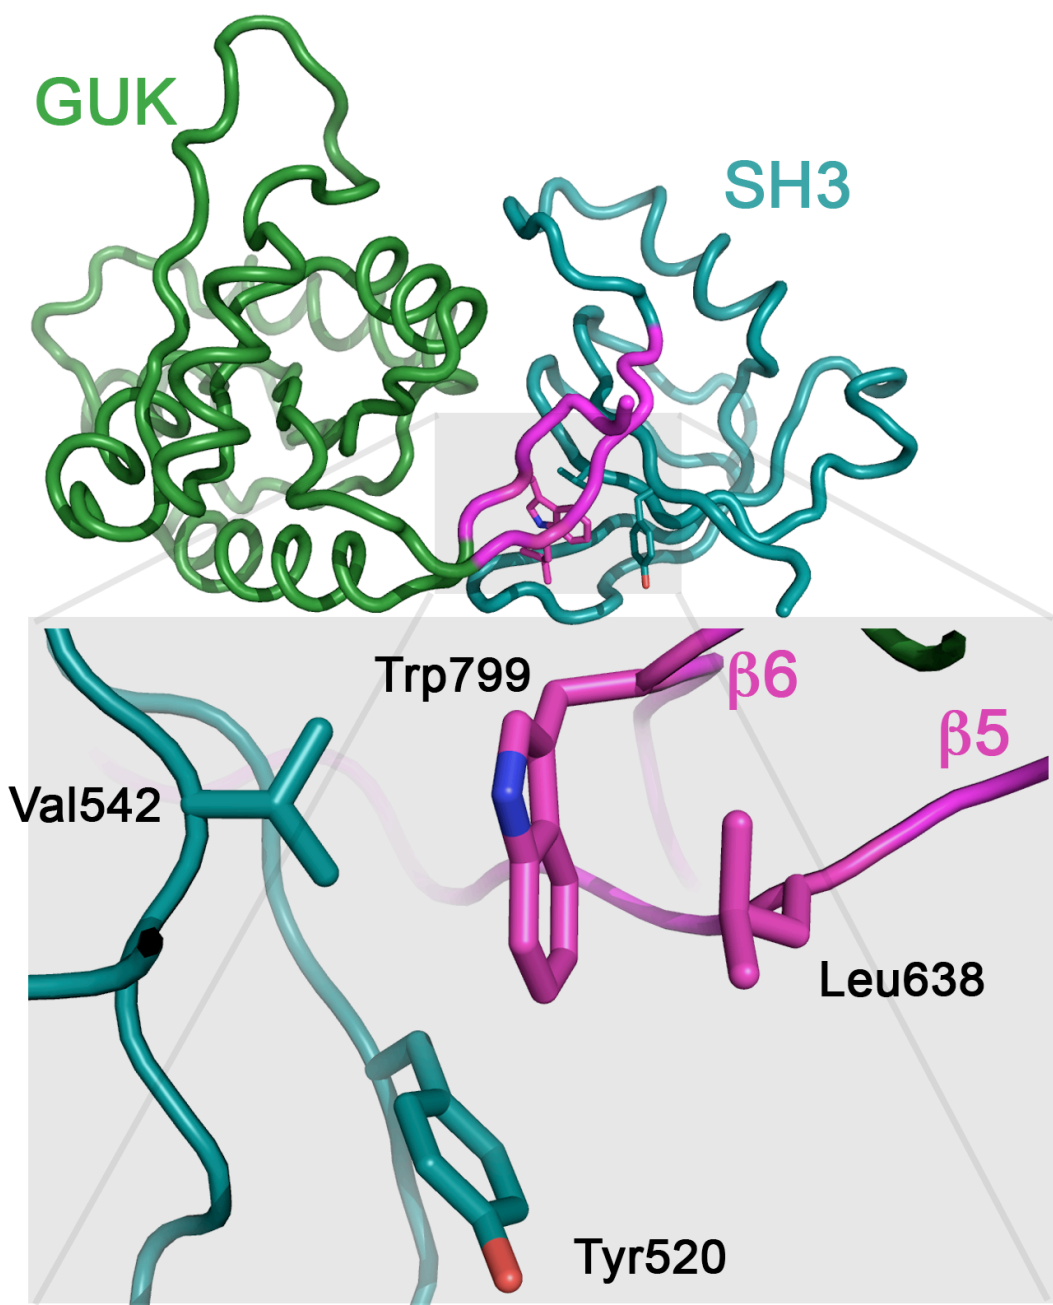

Supplement: supp_M109.093674_jbc.M109.093674-1.pdf [file supp_M109.093674_jbc.M109.093674-1.pdf]
